# Supplementary material for: Do Noisy Customer Reviews Discourage Platform Sellers? Empirical Analysis of an Online Solar Marketplace
Source: Atypon-hosted journal article supplement (doi:10.1287/msom.2021.0104), 2023-09-01
Supplement: msom.2021.0104.sm1.pdf [file msom.2021.0104.sm1.pdf]

## Electronic Companion for “Do Noisy Customer Reviews Discourage Platform Sellers? Empirical Analysis of an Online Solar Marketplace”

**Note #1:** The inverted U-shaped relationship between the installer’s activity level and its competitors’ rating dispersion can be explained as follows. When the rating dispersion of competitors is low, the installer might attribute this dispersion to competitor-related issues rather than systemic market level issues (e.g., polarized customer taste). Thus, the installer might interpret any increase in its competitors’ rating dispersion as damaged competitor reputation, which increases the installer’s likelihood of winning customers. Because of the installer’s larger likelihood of winning, any increase in the competitors’ rating dispersion can motivate the installer to make more proposals. In contrast, when the rating dispersion of competitors is high, the installer might attribute this situation to highly differentiated customer taste in the market. Hence, the installer can perceive any increase in competitors’ rating dispersion as an increased likelihood of a negative customer. To mitigate this risk, the installer might be more selective in its project choices and reduce its activity level.

### A. Details of Defining Local Markets

The OPTICS routine is an unsupervised machine learning algorithm that identifies density-based clusters in spatial data. It is an extension of various commonly-used clustering algorithms (Kanagala and Krishnaiah 2016). Among others, an important advantage of the OPTICS algorithm is that it does not require fixing the number of clusters before running the algorithm as in  $k$ -means clustering method; rather, it generates clusters based on the relative locations and densities of data points. In contrast to  $k$ -means, it allows clusters to be non-convex - a possible scenario as business activities can be shaped by geography (rivers, mountains, etc.) or distribution of population. Because of these and many other advantages, OPTICS has been applied in various contexts, ranging from political science (Davidson 2019) to geography (Teimouri et al. 2016). To our knowledge, in the OM literature, there is no prior work that uses this clustering technique.

In light of these, we create the geographic division of local markets with the following steps. First, we collected the 5-digit zipcode of every installer in the marketplace. We then converted each zipcode to the representative coordinates based on the data provided by the US Census Bureau (2019). This transformation is necessary to run the OPTICS algorithm on the location data. Then, we run the OPTICS algorithm to generate clusters. The OPTICS algorithm uses two key hyperparameters: (1) number of samples in a neighborhood for a point to be considered as a core point ( $min\_samples$ ) and (2) distance between two samples for one to be considered as in the neighborhood ( $eps$ ). A cluster is identified by first identifying a *core sample* where there are more than  $min\_samples$  number of points within  $eps$ , followed by adding other points which are within  $eps$  from the *core sample*. We set the value of  $min\_samples$  at 2 to indicate that a minimum of 2 installers is required to form a *core sample* which is subset of a cluster. Based on our conversations with practitioners, we set 90 kilometers as the distance input parameter  $eps$ , and the OPTICS algorithm generated 37 clusters.

(We also checked the robustness of our results by trying different *eps* values from 80 - 100 kilometers in the OPTICS algorithm. Our insights remain to be valid with these alternative parameters.) Each of these clusters geographically defines a local market boundary. Figure 2 illustrates the centroid of each cluster, which represents the *centroid* of each local market. Considering the clusters with active installers, the mean (median) number of the active installers in a month is 5.99 (4) in a local market.

## B. BERT

We now elaborate the BERT model we used to *vectorize* the text reviews. BERT is a natural language processing (NLP) model that transforms texts into numeric vectors while also preserving the meaning of texts. It belongs to the category of NLP methods that performs word embedding. In literature, in different contexts than ours, text data are commonly vectorized based on word counts, ignoring the semantics and word ordering (see, e.g., Hoberg and Phillips (2016) and Loughran and McDonald (2011)). However, our context involves texts that are informal writings and often contain emotions. Simply capturing word frequencies does not provide accurate results if similar emotions can be expressed with synonymous words. Thus, our analysis requires a vectorization that preserves the information and sentiment of the text reviews despite the use of synonyms and/or different styles. The BERT model achieves that. Specifically, the BERT model has two distinct advantages. First, it understands the semantics. For example, consider the 3 sentences:

Sentence 1: they did a good job. Sentence 2: they did an awful job. Sentence 3: they did a great job.

Considering the meaning of the sentences, we expect the distance between sentences 1 and 3 to be smaller than the distance between 2 and 3 or 1 and 2, i.e.,  $D(1,3) < D(2,3)$  and  $D(1,3) < D(1,2)$ . The BERT model vectorization enables just that; it projects “good” and “great” to vectors that are closer to each other. In this example, with BERT, we have  $D(1,3) < D(1,2) < D(2,3)$ . This level of distinction is not feasible without word embedding (e.g., by simply using a word counter vectorizer). Second, the BERT model takes word ordering into account. For example, the two sentences “The food was good, not bad at all” and “The food was bad, not good at all” have the opposite meanings. Common vectorization methods (e.g., bag-of-words approach) are not able to capture this difference as words and number of counts are the same in both sentences. But, the BERT model can easily differentiate between these two sentences.

## C. Further Details on §7.8

**Note #2:** We define the proportion of no-rating transactions for installer  $i$  up to (and including) month  $t$  as  $Proportion\_No-Rating\_Self_{i,t} = \frac{Matches_{i,t-1} - Reviews_{i,t}}{Matches_{i,t-1}}$ , where  $Matches_{i,t-1}$  is installer  $i$ 's total number of winning quotes up to (and including) period  $t - 1$  and  $Reviews_{i,t}$  represents installer  $i$ 's total review count up to (and including) period  $t$ . Note that  $Matches_{i,t-1}$  and  $Reviews_{i,t}$  have different time indices to capture time between a transaction and the associated online review post. We also construct the

market-level average proportion of no-rating transactions -  $Average\_Proportion\_No\_Rating\_Mkt_{m,t}$  - by taking the average of  $Proportion\_No\_Rating\_Self_{i,t}$  over all active installers in the focal market  $m$  in period  $t$ .

**Note #3:** Including  $Proportion\_No\_Rating\_Self_{i,t}$  and  $Average\_Proportion\_No\_Rating\_Mkt_{m,t}$  as control variables in the installer- and market-level regressions respectively is one way to test the robustness of our findings with respect to the proportion of no-rating transactions. As mentioned in the main text, to perform an alternative robustness check, we incorporate the proportion of no-rating transactions in the main entropy variables without altering their interpretations. To do so, we simply construct the *weighted average rating entropy*  $\mathbb{W}\mathbb{A}$  [Rating Entropy]:

$$\begin{aligned} \mathbb{W}\mathbb{A} [\text{Rating Entropy}] &= [\text{Rating Entropy} | \text{Transactions with Ratings}] \times \text{Fraction of Transactions with Ratings} \\ &\quad + [\text{Rating Entropy} | \text{Transactions with no Ratings}] \times \text{Fraction of No-Rating Transactions,} \end{aligned}$$

where  $[\text{Rating Entropy} | \text{Transactions with no Ratings}]$  is taken as zero. Using this and the fact that  $\text{Fraction of Transactions with Ratings} = 1 - \text{Fraction of No-Rating Transactions}$ , we specifically construct the following two new variables:

$$\begin{aligned} \mathbb{W}\mathbb{A} [\text{Rating\_Entropy\_Self}_{i,t}] &= [\text{Rating\_Entropy\_Self}_{i,t} | \text{Transactions with Ratings}_{i,t}] \times (1 - \text{Proportion\_No-Rating\_Self}_{i,t}) \\ \mathbb{W}\mathbb{A} [\text{Rating\_Entropy\_Mkt}_{m,t}] &= [\text{Rating\_Entropy\_Mkt}_{m,t} | \text{Transactions with Ratings}_{m,t}] \times (1 - \text{Average\_Proportion\_No-Rating\_Mkt}_{m,t}). \end{aligned}$$

The variable  $\mathbb{W}\mathbb{A} [\text{Rating\_Entropy\_Self}_{i,t}]$  represents the weighted average rating entropy of installer  $i$  considering all its ratings up to and including month  $t$ , and the variable  $\mathbb{W}\mathbb{A} [\text{Rating\_Entropy\_Mkt}_{m,t}]$  represents the weighted average rating entropy of market  $m$  considering all the market's ratings up to and including month  $t$ . The variables  $Proportion\_No\_Rating\_Self_{i,t}$  and  $Average\_Proportion\_No\_Rating\_Mkt_{m,t}$  are as defined earlier in the main body of the paper;  $Transactions\ with\ Ratings_{i,t}$  (respectively,  $Transactions\ with\ Ratings_{m,t}$ ) stands for installer  $i$ 's (respectively, market  $m$ 's) transactions with ratings up to and including month  $t$ . We did not construct the weighted average of competitors' rating entropy because competitors' proportion of no-rating response is not visible to an installer.

| Rating | Review                                                                                                       |
|--------|--------------------------------------------------------------------------------------------------------------|
| 1      | The company is selling unregistered securities and making double you money claims to unsuspecting investors. |
| 2      | Proposal was competitive but they didn't show up for a scheduled appointment for an in-home consultation.    |
| 3      | It didn't work out. Let's leave it at that.                                                                  |
| 4      | My project is still under review. Company was responsive to my inquiry.                                      |
| 5      | They did what they said they would at the price quoted. What more can you say?                               |

**Table EC.1** Excerpts of reviews given by customers along with respective ratings

| Variables        | Mean   | Standard Deviation | Min   | Max    |
|------------------|--------|--------------------|-------|--------|
| 1 star Rating %  | 2.258  | 10.819             | 0.000 | 100.00 |
| 2 stars Rating % | 0.641  | 6.380              | 0.000 | 100.00 |
| 3 stars Rating % | 0.535  | 4.378              | 0.000 | 48.65  |
| 4 stars Rating % | 2.872  | 11.332             | 0.000 | 100.00 |
| 5 stars Rating % | 93.695 | 16.990             | 0.000 | 100.00 |

Distribution is taken across all installers over their entire horizons

**Table EC.2 Summary statistics of rating distribution**

| Variables                                           | Mean   | Standard Deviation | Min   | Max     |
|-----------------------------------------------------|--------|--------------------|-------|---------|
| % of Monthly Proposals for an Installer in a Market | 14.728 | 22.889             | 0.000 | 100.000 |
| % of Monthly Matches for an Installer in a Market   | 11.611 | 24.482             | 0.000 | 100.00  |

**Table EC.3 Summary statistics of cluster performance for installers in a market**

| Variables                 | (1)       | (2)       | (3)     | (4)       | (5)      | (6)   | (7) |
|---------------------------|-----------|-----------|---------|-----------|----------|-------|-----|
| (1) Rating_Entropy_Self   | 1         |           |         |           |          |       |     |
| (2) Rating_Entropy_Others | -0.093*** | 1         |         |           |          |       |     |
| (3) Average_Rating_Self   | -0.089*** | 0.069***  | 1       |           |          |       |     |
| (4) Average_Rating_Others | 0.026*    | -0.523*** | -0.017  | 1         |          |       |     |
| (5) Experience            | 0.000     | 0.143***  | 0.036** | -0.062*** | 1        |       |     |
| (6) Price_Difference      | -0.012    | -0.042*** | 0.004   | 0.014     | -0.025*  | 1     |     |
| (7) Average_LogRevenue    | 0.038***  | 0.090***  | 0.019   | -0.028*   | 0.327*** | 0.003 | 1   |

\* $p < 0.1$ ; \*\* $p < 0.05$ ; \*\*\* $p < 0.01$

**Table EC.4 Correlation matrix - installer-level**

| Variable                           | VIF  | 1/VIF |
|------------------------------------|------|-------|
| Rating_Entropy_Self                | 5.33 | 0.188 |
| Rating_Entropy_Self <sup>2</sup>   | 5.34 | 0.187 |
| Rating_Entropy_Others              | 1.70 | 0.587 |
| Rating_Entropy_Others <sup>2</sup> | 1.30 | 0.769 |
| Average_Rating_Self                | 1.02 | 0.983 |
| Average_Rating_Others              | 1.39 | 0.718 |
| Experience                         | 1.18 | 0.848 |
| Price_Difference                   | 1.01 | 0.985 |
| Average_LogRevenue                 | 1.13 | 0.885 |

**Table EC.5 VIF table: installer-level**

| Variable                           | Shapley Value (Estimate) | Percent (Estimate) |
|------------------------------------|--------------------------|--------------------|
| Rating_Entropy_Self                | 0.0361                   | 38.36              |
| Rating_Entropy_Self <sup>2</sup>   | 0.0141                   | 15.00              |
| Rating_Entropy_Others              | 0.0140                   | 14.88              |
| Rating_Entropy_Others <sup>2</sup> | 0.0054                   | 5.74               |
| Average_Rating_Self                | 0.0004                   | 0.42               |
| Average_Rating_Others              | 0.0028                   | 2.99               |

**Table EC.6 Shapley table: installer-level**

| Variable                        | VIF  | 1/VIF |
|---------------------------------|------|-------|
| Rating_Entropy_Mkt              | 2.78 | 0.360 |
| Rating_Entropy_Mkt <sup>2</sup> | 2.15 | 0.465 |
| Average_Rating_Mkt              | 1.61 | 0.621 |
| Average_Experience              | 1.10 | 0.907 |
| Price_Difference_Mkt            | 1.01 | 0.992 |
| Market_LogRevenue               | 1.05 | 0.957 |

**Table EC.7 VIF table: market-level**

| Variables                | (1)       | (2)       | (3)      | (4)    | (5) |
|--------------------------|-----------|-----------|----------|--------|-----|
| (1) Rating_Entropy_Mkt   | 1         |           |          |        |     |
| (2) Average_Rating_Mkt   | -0.611*** | 1         |          |        |     |
| (3) Average_Experience   | 0.232***  | -0.127*** | 1        |        |     |
| (4) Price_Difference_Mkt | -0.015    | -0.018    | -0.056   | 1      |     |
| (5) Market_LogRevenue    | 0.029     | -0.001    | 0.109*** | -0.309 | 1   |

\* $p < 0.1$ ; \*\* $p < 0.05$ ; \*\*\* $p < 0.01$

**Table EC.8 Correlation matrix - market-level**

| Variable                        | Shapley Value (Estimate) | Percent (Estimate) |
|---------------------------------|--------------------------|--------------------|
| Rating_Entropy_Mkt              | 0.092                    | 28.50              |
| Rating_Entropy_Mkt <sup>2</sup> | 0.076                    | 23.33              |
| Average_Rating_Mkt              | 0.011                    | 3.24               |

**Table EC.9 Shapley table: market-level**

| Variables                            | N    | Mean   | Standard Deviation | Min   | Max      |
|--------------------------------------|------|--------|--------------------|-------|----------|
| Text-Length of Reviews of Installers | 3387 | 98.919 | 104.617            | 1.000 | 1992.000 |
| Average Rating of Installers         | 3387 | 4.626  | 1.083              | 1.000 | 5.000    |

**Table EC.10 Summary statistics of reviews and corresponding ratings**

| Variables                    | (1)       | (2)       | (3)       | (4)       | (5)      | (6)   | (7) |
|------------------------------|-----------|-----------|-----------|-----------|----------|-------|-----|
| (1) Average_Sentiment_Self   | 1         |           |           |           |          |       |     |
| (2) Average_Sentiment_Others | -0.035**  | 1         |           |           |          |       |     |
| (3) Text_Dispersion_Others   | -0.048*** | 0.117***  | 1         |           |          |       |     |
| (4) Text_Dispersion_Self     | 0.101***  | -0.077*** | -0.088*** | 1         |          |       |     |
| (5) Experience               | 0.081***  | 0.062***  | 0.077***  | 0.069***  | 1        |       |     |
| (6) Price_Difference         | -0.035**  | 0.003     | -0.010    | -0.056*** | -0.025*  | 1     |     |
| (7) Average_LogRevenue       | 0.022     | 0.022     | 0.111***  | 0.071***  | 0.327*** | 0.003 | 1   |

\* $p < 0.1$ ; \*\* $p < 0.05$ ; \*\*\* $p < 0.01$

**Table EC.11 Correlation matrix - installer-level text-based analysis**

| Variables                    | (1)       | (2)       | (3)       | (4)       | (5)       | (6)       | (7)      | (8) |
|------------------------------|-----------|-----------|-----------|-----------|-----------|-----------|----------|-----|
| (1) Average_Sentiment_Self   | 1         |           |           |           |           |           |          |     |
| (2) Average_Rating_Self      | 0.827***  | 1         |           |           |           |           |          |     |
| (3) Average_Sentiment_Others | -0.035**  | -0.068*** | 1         |           |           |           |          |     |
| (4) Average_Rating_Others    | -0.067*** | -0.017    | 0.457***  | 1         |           |           |          |     |
| (5) Text_Dispersion_Others   | -0.048*** | -0.004    | 0.117***  | -0.107*** | 1         |           |          |     |
| (6) Rating_Entropy_Others    | 0.117***  | 0.069***  | -0.094*** | -0.523*** | 0.177***  | 1         |          |     |
| (7) Text_Dispersion_Self     | 0.101***  | 0.138***  | -0.077*** | 0.000     | -0.088*** | 0.007     | 1        |     |
| (8) Rating_Entropy_Self      | -0.086*** | -0.089*** | 0.069***  | 0.026*    | 0.057***  | -0.093*** | 0.306*** | 1   |

\* $p < 0.1$ ; \*\* $p < 0.05$ ; \*\*\* $p < 0.01$

**Table EC.12 Correlation of ratings and text-based measures (installer-level)**

| Variables                 | (1)       | (2)       | (3)      | (4)       | (5)      | (6)    | (7) |
|---------------------------|-----------|-----------|----------|-----------|----------|--------|-----|
| (1) Text_Dispersion_Mkt   | 1         |           |          |           |          |        |     |
| (2) Rating_Entropy_Mkt    | 0.099***  | 1         |          |           |          |        |     |
| (3) Average_Sentiment_Mkt | -0.362*** | 0.079**   | 1        |           |          |        |     |
| (4) Average_Rating_Mkt    | -0.104*** | -0.611*** | 0.226*** | 1         |          |        |     |
| (5) Average_Experience    | -0.029    | 0.232***  | 0.115*** | -0.127*** | 1        |        |     |
| (6) Price_Difference_Mkt  | 0.097***  | -0.015    | 0.009    | -0.018    | -0.056   | 1      |     |
| (7) Market_LogRevenue     | -0.057    | 0.029     | 0.007    | -0.001    | 0.109*** | -0.039 | 1   |

\* $p < 0.1$ ; \*\* $p < 0.05$ ; \*\*\* $p < 0.01$

**Table EC.13 Correlation matrix - market-level text-based analysis**

| Variables                | N     | Mean  | Standard Deviation | Min    | Max   |
|--------------------------|-------|-------|--------------------|--------|-------|
| Text_Dispersion_Self     | 4,384 | 0.000 | 0.070              | -0.099 | 0.282 |
| Text_Dispersion_Others   | 4,384 | 0.000 | 0.027              | -0.122 | 0.244 |
| Average_Sentiment_Self   | 4,384 | 0.633 | 0.238              | -0.827 | 0.958 |
| Average_Sentiment_Others | 4,384 | 0.681 | 0.092              | -0.599 | 0.958 |
| Text_Dispersion_Mkt      | 748   | 0.000 | 0.035              | -0.061 | 0.236 |
| Average_Sentiment_Mkt    | 748   | 0.675 | 0.107              | 0.059  | 0.886 |

**Table EC.14** Summary statistics of text-based variables for installer and market-level

| Variables                           | (I)<br>Installer's Activity Level | (II)<br>Installer's Activity Level | (III)<br>Installer's Activity Level | (IV)<br>Installer's Activity Level |
|-------------------------------------|-----------------------------------|------------------------------------|-------------------------------------|------------------------------------|
| Text_Dispersion_Self                | 1.266*<br>(0.023)                 | 1.255*<br>(0.025)                  | 1.213*<br>(0.034)                   | 1.294*<br>(0.022)                  |
| Text_Dispersion_Self <sup>2</sup>   | -27.023***<br>(0.000)             | -27.229***<br>(0.000)              | -21.619***<br>(0.000)               | -22.007***<br>(0.000)              |
| Text_Dispersion_Others              | -2.425*<br>(0.024)                | -2.303*<br>(0.032)                 | -2.121*<br>(0.046)                  | -2.216*<br>(0.037)                 |
| Text_Dispersion_Others <sup>2</sup> | -40.919***<br>(0.000)             | -42.512***<br>(0.000)              | -31.980**<br>(0.005)                | -31.824**<br>(0.005)               |
| Average_Rating_Self                 | -0.262***<br>(0.000)              |                                    |                                     | -0.280***<br>(0.000)               |
| Average_Rating_Others               | -0.032<br>(0.771)                 |                                    |                                     | -0.030<br>(0.796)                  |
| Average_Sentiment_Self              |                                   | -0.667**<br>(0.001)                | -0.643**<br>(0.002)                 |                                    |
| Average_Sentiment_Others            |                                   | 0.228<br>(0.433)                   | 0.315<br>(0.304)                    |                                    |
| Rating_Entropy_Self                 |                                   |                                    | 1.947***<br>(0.000)                 | 1.867***<br>(0.000)                |
| Rating_Entropy_Self <sup>2</sup>    |                                   |                                    | -3.976***<br>(0.000)                | -4.091***<br>(0.000)               |
| Rating_Entropy_Others               |                                   |                                    | 0.415*<br>(0.032)                   | 0.331*<br>(0.095)                  |
| Rating_Entropy_Others <sup>2</sup>  |                                   |                                    | -2.595***<br>(0.000)                | -2.599***<br>(0.000)               |
| Experience                          | 0.674***<br>(0.000)               | 0.683***<br>(0.000)                | 0.547***<br>(0.000)                 | 0.544***<br>(0.000)                |
| Price_Difference                    | 0.027<br>(0.746)                  | 0.029<br>(0.733)                   | 0.049<br>(0.561)                    | 0.054<br>(0.521)                   |
| Average_LogRevenue                  | 0.013<br>(0.220)                  | 0.013<br>(0.218)                   | 0.015<br>(0.143)                    | 0.016<br>(0.139)                   |
| Constant                            | 3.030*<br>(0.019)                 | 1.886*<br>(0.100)                  | 2.204*<br>(0.054)                   | 3.510*<br>(0.008)                  |
| Fixed Effects                       | Yes                               | Yes                                | Yes                                 | Yes                                |
| State Dummies                       | Yes                               | Yes                                | Yes                                 | Yes                                |
| Seasonality                         | Yes                               | Yes                                | Yes                                 | Yes                                |
| Observations                        | 4187                              | 4187                               | 4187                                | 4187                               |
| Adjusted R <sup>2</sup>             | 0.612                             | 0.612                              | 0.618                               | 0.619                              |

*p*-value in parentheses: 0 < \*\*\* < 0.001 < \*\* < 0.01 < \* < 0.05 < • < 0.1

**Table EC.15** Installer-level analysis with variables derived from text analysis

| Variables                        | (I)<br>Market Transaction | (II)<br>Market Transaction | (III)<br>Market Transaction | (IV)<br>Market Transaction |
|----------------------------------|---------------------------|----------------------------|-----------------------------|----------------------------|
| Rating_Entropy_Mkt               |                           |                            | 0.859***<br>(0.000)         | 0.903***<br>(0.000)        |
| Rating_Entropy_Mkt <sup>2</sup>  |                           |                            | -1.505***<br>(0.000)        | -1.491***<br>(0.001)       |
| Average_Rating_Mkt               | -0.128<br>(0.312)         |                            |                             | -0.067<br>(0.620)          |
| Average_Sentiment_Mkt            |                           | -0.952**<br>(0.009)        | -0.869*<br>(0.018)          |                            |
| Average_Experience               | 0.030<br>(0.810)          | -0.018<br>(0.883)          | -0.067<br>(0.588)           | -0.027<br>(0.828)          |
| Price_Difference_Mkt             | -0.031<br>(0.887)         | -0.016<br>(0.940)          | -0.084<br>(0.697)           | -0.093<br>(0.668)          |
| Market_LogRevenue                | -0.002<br>(0.888)         | -0.001<br>(0.918)          | -0.006<br>(0.684)           | -0.006<br>(0.649)          |
| Text_Dispersion_Mkt              | -0.023<br>(0.990)         | -0.615<br>(0.741)          | -2.396<br>(0.206)           | -1.792<br>(0.344)          |
| Text_Dispersion_Mkt <sup>2</sup> | -15.669<br>(0.172)        | -12.586<br>(0.273)         | -3.867<br>(0.738)           | -6.988<br>(0.546)          |
| Constant                         | 0.037<br>(0.996)          | 0.330<br>(0.966)           | 0.119<br>(0.988)            | -0.365<br>(0.963)          |
| Fixed Effects                    | Yes                       | Yes                        | Yes                         | Yes                        |
| Weighted State Dummies           | Yes                       | Yes                        | Yes                         | Yes                        |
| Seasonality                      | Yes                       | Yes                        | Yes                         | Yes                        |
| Observations                     | 616                       | 616                        | 616                         | 616                        |
| Adjusted R <sup>2</sup>          | 0.756                     | 0.758                      | 0.764                       | 0.761                      |

*p*-value in parentheses: 0 < \*\*\* < 0.001 < \*\* < 0.01 < \* < 0.05 < • < 0.1

**Table EC.16** Market-level analysis with variables derived from text analysis

| Installer-level dynamic panel                                      |       |                    |                 |
|--------------------------------------------------------------------|-------|--------------------|-----------------|
|                                                                    | Order | z                  | <i>p</i> -value |
| $H_0$ : No correlation between $\Delta_{i,t}$ and $\Delta_{i,t-1}$ |       | -24.643            | 0.000           |
| $H_0$ : No correlation between $\Delta_{i,t}$ and $\Delta_{i,t-2}$ |       | 0.412              | 0.680           |
| Sargan Test for overidentifying restriction                        |       | $\chi^2 = 997.639$ | 0.079           |
| Market-level dynamic panel                                         |       |                    |                 |
|                                                                    | Order | z                  | <i>p</i> -value |
| $H_0$ : No correlation between $\Delta_{i,t}$ and $\Delta_{i,t-1}$ |       | -13.148            | 0.000           |
| $H_0$ : No correlation between $\Delta_{i,t}$ and $\Delta_{i,t-2}$ |       | -0.712             | 0.477           |
| Sargan Test for overidentifying restriction                        |       | $\chi^2 = 403.203$ | 0.058           |

**Table EC.17** Dynamic panel specification checks

| Variables                             | (I)<br>Installer's<br>Activity Level | (II)<br>Installer's<br>Activity Level | (III)<br>Installer's<br>Activity Level | (IV)<br>Installer's<br>Activity Level |
|---------------------------------------|--------------------------------------|---------------------------------------|----------------------------------------|---------------------------------------|
| Installer Activity Level <sub>t</sub> | 0.538***<br>(0.000)                  | 0.528***<br>(0.000)                   | 0.527***<br>(0.000)                    | 0.519***<br>(0.000)                   |
| Rating_Entropy_Self                   |                                      |                                       | 1.677**<br>(0.007)                     | 1.600*<br>(0.010)                     |
| Rating_Entropy_Self <sup>2</sup>      |                                      |                                       | -2.93*<br>(0.013)                      | -2.797*<br>(0.015)                    |
| Rating_Entropy_Others                 |                                      | 0.521*<br>(0.041)                     |                                        | 0.428*<br>(0.090)                     |
| Rating_Entropy_Others <sup>2</sup>    |                                      | -1.616*<br>(0.041)                    |                                        | -1.510*<br>(0.056)                    |
| Average_Rating_Self                   | 0.073<br>(0.394)                     | 0.078<br>(0.373)                      | 0.089<br>(0.343)                       | 0.089<br>(0.350)                      |
| Average_Rating_Others                 | -0.138<br>(0.293)                    | -0.056<br>(0.684)                     | -0.101<br>(0.444)                      | -0.041<br>(0.768)                     |
| Experience                            | 0.426<br>(0.132)                     | 0.287<br>(0.251)                      | 0.315<br>(0.234)                       | 0.203<br>(0.388)                      |
| Price_Difference                      | -0.048<br>(0.759)                    | -0.034<br>(0.832)                     | -0.042<br>(0.777)                      | -0.028<br>(0.855)                     |
| Average_LogRevenue                    | 0.003<br>(0.772)                     | 0.004<br>(0.737)                      | 0.003<br>(0.772)                       | 0.004<br>(0.741)                      |
| Fixed Effects                         | Yes                                  | Yes                                   | Yes                                    | Yes                                   |
| Seasonality                           | Yes                                  | Yes                                   | Yes                                    | Yes                                   |
| Observations                          | 3872                                 | 3872                                  | 3872                                   | 3872                                  |

*p*-value in parentheses: 0 < \*\*\* < 0.001 < \*\* < 0.01 < \* < 0.05 < • < 0.1

**Table EC.18 Robustness check - installer-level dynamic panels**

| Variables                         | (I)<br>Market Transaction | (II)<br>Market Transaction |
|-----------------------------------|---------------------------|----------------------------|
| Rating_Entropy_Mkt                |                           | 0.628**<br>(0.002)         |
| Rating_Entropy_Mkt <sup>2</sup>   |                           | -1.176***<br>(0.000)       |
| Average_Rating_Mkt                | 0.090<br>(0.385)          | 0.049<br>(0.506)           |
| Market_LogRevenue                 | -0.011<br>(0.478)         | -0.013<br>(0.408)          |
| Average_Experience                | -0.010<br>(0.867)         | -0.023<br>(0.692)          |
| Price_Difference_Mkt              | 0.197<br>(0.503)          | 0.101<br>(0.728)           |
| Market_Transaction <sub>t</sub>   | 0.229**<br>(0.001)        | 0.213**<br>(0.003)         |
| Market_Transaction <sub>t-1</sub> | 0.112*<br>(0.012)         | 0.111*<br>(0.010)          |
| Market_Transaction <sub>t-2</sub> | 0.118*<br>(0.014)         | 0.115*<br>(0.015)          |
| Fixed Effects                     | Yes                       | Yes                        |
| Seasonality                       | Yes                       | Yes                        |
| Observations                      | 423                       | 423                        |

*p*-value in parentheses: 0 < \*\*\* < 0.001 < \*\* < 0.01 < \* < 0.05 < • < 0.1

**Table EC.19 Robustness check - market-level dynamic panels**

| Variables               | (I)<br>Installer's<br>Activity Level | (II)<br>Installer's<br>Activity Level | (III)<br>Installer's<br>Activity Level | (IV)<br>Installer's<br>Activity Level |
|-------------------------|--------------------------------------|---------------------------------------|----------------------------------------|---------------------------------------|
| Rating_Entropy_Others_1 | 0.624**<br>(0.004)                   |                                       |                                        |                                       |
| Rating_Entropy_Others_2 | -2.024***<br>(0.000)                 |                                       |                                        |                                       |
| Rating_Entropy_Self_1   |                                      | 1.570***<br>(0.000)                   |                                        |                                       |
| Rating_Entropy_Self_2   |                                      | -3.112***<br>(0.000)                  |                                        |                                       |
| Rating_Entropy_Others_1 |                                      |                                       | 0.820**<br>(0.001)                     |                                       |
| Rating_Entropy_Others_2 |                                      |                                       | -1.923*<br>(0.029)                     |                                       |
| Rating_Entropy_Others_3 |                                      |                                       | -1.317•<br>(0.083)                     |                                       |
| Rating_Entropy_Self_1   |                                      |                                       |                                        | 2.498***<br>(0.000)                   |
| Rating_Entropy_Self_2   |                                      |                                       |                                        | -3.542***<br>(0.000)                  |
| Rating_Entropy_Self_3   |                                      |                                       |                                        | -2.071•<br>(0.072)                    |
| Controls                | Yes                                  | Yes                                   | Yes                                    | Yes                                   |
| Fixed Effects           | Yes                                  | Yes                                   | Yes                                    | Yes                                   |
| State Dummies           | Yes                                  | Yes                                   | Yes                                    | Yes                                   |
| Seasonality             | Yes                                  | Yes                                   | Yes                                    | Yes                                   |
| Observations            | 4187                                 | 4187                                  | 4187                                   | 4187                                  |
| Adjusted R <sup>2</sup> | 0.606                                | 0.610                                 | 0.607                                  | 0.611                                 |

p-value in parentheses: 0 < \*\*\* < 0.001 < \*\* < 0.01 < \* < 0.05 < • < 0.1

**Table EC.20 Alternative inverted-U testing: spline regressions (installer-level)**

| Variables               | (I)<br>Market Transaction | (II)<br>Market Transaction |
|-------------------------|---------------------------|----------------------------|
| Rating_Entropy_Mkt_1    | 0.833***<br>(0.000)       |                            |
| Rating_Entropy_Mkt_2    | -1.088*<br>(0.013)        |                            |
| Rating_Entropy_Mkt_1    |                           | 2.602***<br>(0.000)        |
| Rating_Entropy_Mkt_2    |                           | -3.909**<br>(0.002)        |
| Rating_Entropy_Mkt_3    |                           | -0.575•<br>(0.074)         |
| Controls                | Yes                       | Yes                        |
| Fixed Effects           | Yes                       | Yes                        |
| Weighted State Dummies  | Yes                       | Yes                        |
| Seasonality             | Yes                       | Yes                        |
| Observations            | 619                       | 619                        |
| Adjusted R <sup>2</sup> | 0.742                     | 0.756                      |

p-value in parentheses: 0 < \*\*\* < 0.001 < \*\* < 0.01 < \* < 0.05 < • < 0.1

**Table EC.21 Alternative inverted-U testing: spline regressions (market-level)**

| Variables                           | (I)<br>Installer's<br>Activity | (II)<br>Installer's<br>Activity | (III)<br>Installer's<br>Activity |
|-------------------------------------|--------------------------------|---------------------------------|----------------------------------|
| Text_Dispersion_Self                |                                | 0.625<br>(0.434)                | 0.593<br>(0.471)                 |
| Text_Dispersion_Self <sup>2</sup>   |                                | -26.554***<br>(0.000)           | -25.783***<br>(0.000)            |
| Text_Dispersion_Others              | -2.407*<br>(0.016)             | -1.736*<br>(0.087)              | -1.589<br>(0.116)                |
| Text_Dispersion_Others <sup>2</sup> | -37.872**<br>(0.003)           | -30.952*<br>(0.013)             | -30.300*<br>(0.014)              |
| Average_Rating_Self                 | -0.265**<br>(0.007)            | -0.284**<br>(0.005)             |                                  |
| Average_Rating_Others               | -0.040<br>(0.722)              | -0.029<br>(0.794)               |                                  |
| Average_Sentiment_Self              |                                |                                 | -0.646*<br>(0.014)               |
| Average_Sentiment_Others            |                                |                                 | 0.302<br>(0.309)                 |
| Rating_Entropy_Self                 | 2.372***<br>(0.000)            | 1.949***<br>(0.000)             | 2.302***<br>(0.000)              |
| Rating_Entropy_Self <sup>2</sup>    | -4.359***<br>(0.000)           | -4.174***<br>(0.000)            | -4.061***<br>(0.000)             |
| Rating_Entropy_Others               | 0.438*<br>(0.033)              | 0.310<br>(0.136)                | 0.393***<br>(0.000)              |
| Rating_Entropy_Others <sup>2</sup>  | -2.859***<br>(0.000)           | -2.572***<br>(0.000)            | -2.571***<br>(0.000)             |
| Price_Difference                    | 0.012<br>(0.899)               | 0.060<br>(0.535)                | 0.055<br>(0.573)                 |
| Average_LogRevenue                  | 0.015<br>(0.177)               | 0.015<br>(0.180)                | 0.015<br>(0.186)                 |
| Experience                          | 0.604***<br>(0.000)            | 0.530***<br>(0.000)             | 0.533***<br>(0.000)              |
| Constant                            | 2.491**<br>(0.003)             | 2.865**<br>(0.001)              | 1.559**<br>(0.001)               |
| Fixed Effects                       | Yes                            | Yes                             | Yes                              |
| State Dummies                       | Yes                            | Yes                             | Yes                              |
| Seasonality                         | Yes                            | Yes                             | Yes                              |
| Observations                        | 4187                           | 4187                            | 4187                             |
| Adjusted R <sup>2</sup>             | 0.615                          | 0.618                           | 0.618                            |

p-value in parentheses: 0 < \*\*\* < 0.001 < \*\* < 0.01 < \* < 0.05 < • < 0.1

The text-based dispersion variables are derived by taking mean, instead of median, of pairwise cosine distances.

**Table EC.22 Robustness check - installer-level analysis with text-based dispersion from mean cosine distances**

| Variables                        | (I)<br>Market<br>Transaction | (II)<br>Market<br>Transaction | (III)<br>Market<br>Transaction |
|----------------------------------|------------------------------|-------------------------------|--------------------------------|
| Rating_Entropy_Mkt               |                              |                               | 0.746**<br>(0.003)             |
| Rating_Entropy_Mkt <sup>2</sup>  |                              |                               | -1.319**<br>(0.001)            |
| Average_Rating_Mkt               | -0.104<br>(0.400)            |                               |                                |
| Average_Sentiment_Mkt            |                              | -0.869*<br>(0.034)            | -0.807*<br>(0.049)             |
| Average_Experience               | -0.008<br>(0.951)            | -0.049<br>(0.706)             | -0.083<br>(0.535)              |
| Price_Difference_Mkt             | -0.002<br>(0.995)            | 0.014<br>(0.959)              | -0.049<br>(0.855)              |
| Market_LogRevenue                | -0.004<br>(0.772)            | -0.003<br>(0.802)             | -0.007<br>(0.591)              |
| Text_Dispersion_Mkt              | 0.457<br>(0.741)             | -0.145<br>(0.918)             | -1.390**<br>(0.001)            |
| Text_Dispersion_Mkt <sup>2</sup> | -73.006***<br>(0.000)        | -68.863***<br>(0.000)         | -58.375**<br>(0.002)           |
| Constant                         | 1.801<br>(0.107)             | 1.972*<br>(0.049)             | 1.940*<br>(0.048)              |
| Fixed Effects                    | Yes                          | Yes                           | Yes                            |
| Weighted State Dummies           | Yes                          | Yes                           | Yes                            |
| Seasonality                      | Yes                          | Yes                           | Yes                            |
| Observations                     | 619                          | 619                           | 619                            |
| Adjusted R <sup>2</sup>          | 0.763                        | 0.765                         | 0.769                          |

p-value in parentheses: 0 < \*\*\* < 0.001 < \*\* < 0.01 < \* < 0.05 < • < 0.1

The text-based dispersion variables are derived by taking mean, instead of median, of pairwise cosine distances.

**Table EC.23 Robustness check - market-level analysis with text-based dispersion from mean cosine distances**

| Variables                       | (1)<br>Market<br>Transaction | (2)<br>Market<br>Transaction | (3)<br>Market<br>Transaction |
|---------------------------------|------------------------------|------------------------------|------------------------------|
| Rating_Entropy_Mkt              | 1.214**<br>(0.002)           | 1.300***<br>(0.000)          | 1.644**<br>(0.002)           |
| Rating_Entropy_Mkt <sup>2</sup> | -3.232***<br>(0.000)         | -2.218***<br>(0.000)         | -2.014*<br>(0.025)           |
| Average_Rating_Mkt              | 0.068<br>(0.703)             | -0.056<br>(0.799)            | 0.583•<br>(0.083)            |
| Market_LogRevenue               | -0.024<br>(0.217)            | -0.007<br>(0.754)            | -0.054<br>(0.164)            |
| Average_Experience              | -0.197<br>(0.378)            | 0.296<br>(0.101)             | 0.502<br>(0.140)             |
| Price_Difference_Mkt            | 0.391<br>(0.291)             | -0.217<br>(0.456)            | -0.455<br>(0.250)            |
| Constant                        | 1.588<br>(0.142)             | 0.429<br>(0.705)             | -1.479<br>(0.420)            |
| Fixed Effects                   | Yes                          | Yes                          | Yes                          |
| State Dummies                   | Yes                          | Yes                          | Yes                          |
| Seasonality                     | Yes                          | Yes                          | Yes                          |
| Observations                    | 390                          | 306                          | 146                          |
| Adjusted R <sup>2</sup>         | 0.779                        | 0.757                        | 0.743                        |

p-value in parentheses: 0 < \*\*\* < 0.001 < \*\* < 0.01 < \* < 0.05 < • < 0.1

Column (I): restrict sample to reviews count >= 8

Column (II): resample to bi-monthly

Column (III): resample to quarterly

**Table EC.24 Robustness check: subset with only high review count or altered sampling frequency (bi-monthly and quarterly)**

| Variables                      | (I)<br>Installer's<br>Activity Level | (II)<br>Installer's<br>Activity Level | (III)<br>Installer's<br>Activity Level |
|--------------------------------|--------------------------------------|---------------------------------------|----------------------------------------|
| Rating_HHI_Self                | 24.449***<br>(0.000)                 |                                       | 24.085***<br>(0.000)                   |
| Rating_HHI_Self <sup>2</sup>   | -15.698***<br>(0.000)                |                                       | -15.478***<br>(0.000)                  |
| Rating_HHI_Others              |                                      | 25.974***<br>(0.000)                  | 25.929***<br>(0.000)                   |
| Rating_HHI_Others <sup>2</sup> |                                      | -16.829***<br>(0.000)                 | -16.776***<br>(0.000)                  |
| Average_Rating_Self            | -0.062<br>(0.603)                    | -0.187•<br>(0.089)                    | -0.045<br>(0.705)                      |
| Average_Rating_Others          | -0.070<br>(0.486)                    | 0.328**<br>(0.008)                    | 0.296*<br>(0.016)                      |
| Experience                     | 0.625***<br>(0.000)                  | 0.600***<br>(0.000)                   | 0.392**<br>(0.008)                     |
| Price_Difference               | -0.034<br>(0.746)                    | -0.048<br>(0.648)                     | -0.072<br>(0.485)                      |
| Average_LogRevenue             | 0.019•<br>(0.095)                    | 0.017<br>(0.131)                      | 0.014<br>(0.207)                       |
| Constant                       | -7.571***<br>(0.000)                 | -9.584**<br>(0.000)                   | -18.313***<br>(0.000)                  |
| Fixed Effects                  | Yes                                  | Yes                                   | Yes                                    |
| State Dummies                  | Yes                                  | Yes                                   | Yes                                    |
| Seasonality                    | Yes                                  | Yes                                   | Yes                                    |
| Observations                   | 3877                                 | 3877                                  | 3877                                   |
| Adjusted R <sup>2</sup>        | 0.620                                | 0.624                                 | 0.629                                  |

p-value in parentheses: 0 < \*\*\* < 0.001 < \*\* < 0.01 < \* < 0.05 < • < 0.1

**Table EC.25 Installer-level analysis (Activity vs. HHI)**

| Variables                   | (I)<br>Market<br>Transaction | (II)<br>Market<br>Transaction |
|-----------------------------|------------------------------|-------------------------------|
| Rating_HHI_Mkt              |                              | 15.178***<br>(0.000)          |
| Rating_HHI_Mkt <sup>2</sup> |                              | -10.663***<br>(0.000)         |
| Average_Rating_Mkt          | -0.194<br>(0.143)            | 0.100<br>(0.446)              |
| Average_Experience          | 0.160<br>(0.240)             | 0.532**<br>(0.008)            |
| Price_Difference_Mkt        | -0.372<br>(0.211)            | -0.537<br>(0.134)             |
| Market_LogRevenue           | -0.007<br>(0.616)            | -0.015<br>(0.359)             |
| Constant                    | 1.366•<br>(0.053)            | -5.292***<br>(0.000)          |
| Fixed Effects               | Yes                          | Yes                           |
| Weighted State Dummies      | Yes                          | Yes                           |
| Seasonality                 | Yes                          | Yes                           |
| Observations                | 619                          | 467                           |
| Adjusted R <sup>2</sup>     | 0.735                        | 0.771                         |

p-value in parentheses: 0 < \*\*\* < 0.001 < \*\* < 0.01 < \* < 0.05 < • < 0.1

**Table EC.26 Market-level analysis (Transaction vs. HHI)**

| Variables                                     | (I)<br>Installer's Activity Level | (II)<br>Installer's Activity Level | (III)<br>Installer's Activity Level |
|-----------------------------------------------|-----------------------------------|------------------------------------|-------------------------------------|
| Rating_Bin                                    | -0.221***<br>(0.000)              | -0.223***<br>(0.000)               | -0.145<br>(0.122)                   |
| Rating_Bin × Rating_Entropy_Self              |                                   | 0.094<br>(0.742)                   | 0.762<br>(0.237)                    |
| Rating_Bin × Rating_Entropy_Self <sup>2</sup> |                                   |                                    | -1.908<br>(0.247)                   |
| Rating_Entropy_Self                           | 2.228***<br>(0.000)               | 2.178***<br>(0.000)                | 2.067***<br>(0.000)                 |
| Rating_Entropy_Self <sup>2</sup>              | -3.870***<br>(0.000)              | -3.821***<br>(0.000)               | -3.586***<br>(0.000)                |
| Rating_Entropy_Others                         | 0.630***<br>(0.000)               | 0.626***<br>(0.000)                | 0.622***<br>(0.000)                 |
| Rating_Entropy_Others <sup>2</sup>            | -3.104***<br>(0.000)              | -3.009***<br>(0.000)               | -2.988***<br>(0.000)                |
| Experience                                    | 0.619***<br>(0.000)               | 0.623***<br>(0.000)                | 0.611***<br>(0.000)                 |
| Price_Difference                              | 0.009<br>(0.915)                  | 0.010<br>(0.905)                   | 0.019<br>(0.824)                    |
| Average_LogRevenue                            | 0.019•<br>(0.066)                 | 0.019•<br>(0.066)                  | 0.019•<br>(0.065)                   |
| Constant                                      | 1.449<br>(0.191)                  | 1.435•<br>(0.197)                  | 1.444<br>(0.194)                    |
| Fixed Effects                                 | Yes                               | Yes                                | Yes                                 |
| State Dummies                                 | Yes                               | Yes                                | Yes                                 |
| Seasonality                                   | Yes                               | Yes                                | Yes                                 |
| Observations                                  | 4187                              | 4187                               | 4187                                |
| Adjusted R <sup>2</sup>                       | 0.614                             | 0.614                              | 0.614                               |

*p*-value in parentheses: 0 < \*\*\* < 0.001 < \*\* < 0.01 < \* < 0.05 < • < 0.1

**Table EC.27** Installer-level analysis with rating-bins

| Variables                          | Installer's Activity Level |
|------------------------------------|----------------------------|
| Average_Rating_Self                | -0.195*<br>(0.017)         |
| Average_Rating_Others              | -0.043<br>(0.724)          |
| Rating_Entropy_Self                | 2.289***<br>(0.000)        |
| Rating_Entropy_Self <sup>2</sup>   | -3.898***<br>(0.000)       |
| Rating_Entropy_Others              | 0.317<br>(0.122)           |
| Rating_Entropy_Others <sup>2</sup> | -2.497***<br>(0.000)       |
| Experience                         | 0.523***<br>(0.000)        |
| Price_Difference                   | -0.016<br>(0.854)          |
| Average_LogRevenue                 | 0.015<br>(0.178)           |
| Proportion_No-Rating_Self          | 0.396***<br>(0.001)        |
| Constant                           | 2.284•<br>(0.086)          |
| Fixed Effects                      | Yes                        |
| State Dummies                      | Yes                        |
| Seasonality                        | Yes                        |
| Observations                       | 3872                       |
| Adjusted R <sup>2</sup>            | 0.628                      |

*p*-value in parentheses: 0 < \*\*\* < 0.001 < \*\* < 0.01 < \* < 0.05 < • < 0.1

**Table EC.28** Installer-level analysis with proportion of no-rating transactions as a control

| Variables                        | Market Transaction  |
|----------------------------------|---------------------|
| Average_Rating_Mkt               | -0.047<br>(0.739)   |
| Rating_Entropy_Mkt               | 0.868***<br>(0.001) |
| Rating_Entropy_Mkt <sup>2</sup>  | -0.913*<br>(0.031)  |
| Average_Experience               | -0.056<br>(0.655)   |
| Price_Difference_Mkt             | 0.295<br>(0.212)    |
| Market_LogRevenue                | -0.001<br>(0.937)   |
| Average_Proportion_No-Rating_Mkt | 0.573***<br>(0.000) |
| Constant                         | 3.959<br>(0.644)    |
| Fixed Effects                    | Yes                 |
| Weighted State Dummies           | Yes                 |
| Seasonality                      | Yes                 |
| Observations                     | 536                 |
| Adjusted R <sup>2</sup>          | 0.801               |

*p*-value in parentheses: 0 < \*\*\* < 0.001 < \*\* < 0.01 < \* < 0.05 < • < 0.1

**Table EC.29** Market-level analysis with proportion of no-rating transactions as a control

| Variables                             | Installer's Activity Level |
|---------------------------------------|----------------------------|
| Average_Rating_Self                   | -0.242**<br>(0.002)        |
| Average_Rating_Others                 | -0.063<br>(0.607)          |
| WA [Rating_Entropy_Self]              | 1.990***<br>(0.000)        |
| WA [Rating_Entropy_Self] <sup>2</sup> | -4.308***<br>(0.000)       |
| Rating_Entropy_Others                 | 0.367•<br>(0.073)          |
| Rating_Entropy_Others <sup>2</sup>    | -2.584***<br>(0.000)       |
| Experience                            | 0.665***<br>(0.000)        |
| Price_Difference                      | 0.003<br>(0.975)           |
| Average_LogRevenue                    | 0.013<br>(0.221)           |
| Constant                              | 2.362•<br>(0.076)          |
| Fixed Effects                         | Yes                        |
| State Dummies                         | Yes                        |
| Seasonality                           | Yes                        |
| Observations                          | 3872                       |
| Adjusted R <sup>2</sup>               | 0.626                      |

*p*-value in parentheses: 0 < \*\*\* < 0.001 < \*\* < 0.01 < \* < 0.05 < • < 0.1

**Table EC.30** Installer-level analysis using the weighted average installer-level rating entropy

| Variables                            | Market Transaction |
|--------------------------------------|--------------------|
| Average_Rating_Mkt                   | -0.063<br>(0.656)  |
| WA [Rating_Entropy_Mkt]              | 0.600*<br>(0.038)  |
| WA [Rating_Entropy_Mkt] <sup>2</sup> | -1.068*<br>(0.025) |
| Average_Experience                   | -0.055<br>(0.667)  |
| Price_Difference_Mkt                 | 0.096<br>(0.682)   |
| Market_LogRevenue                    | 0.002<br>(0.889)   |
| Constant                             | 6.798<br>(0.436)   |
| Fixed Effects                        | Yes                |
| Weighted State Dummies               | Yes                |
| Seasonality                          | Yes                |
| Observations                         | 536                |
| Adjusted R <sup>2</sup>              | 0.792              |

*p*-value in parentheses: 0 < \*\*\* < 0.001 < \*\* < 0.01 < \* < 0.05 < • < 0.1

**Table EC.31** Market-level analysis using the weighted average market-level rating entropy

| Variables                          | (I)                                        | (II)                                        | (III)                                       |
|------------------------------------|--------------------------------------------|---------------------------------------------|---------------------------------------------|
|                                    | Installer's Activity<br>Level (Market = 4) | Installer's Activity<br>Level (Market = 36) | Installer's Activity<br>Level (Market = 17) |
| Rating_Entropy_Self                | 2.343**<br>(0.009)                         | 4.680***<br>(0.000)                         | 5.139*<br>(0.025)                           |
| Rating_Entropy_Self <sup>2</sup>   | -6.289**<br>(0.002)                        | -15.580***<br>(0.000)                       | -10.009*<br>(0.011)                         |
| Rating_Entropy_Others              | -2.546**<br>(0.005)                        | -4.183***<br>(0.000)                        | 2.448*<br>(0.009)                           |
| Rating_Entropy_Others <sup>2</sup> | -4.907<br>(0.303)                          | -18.024***<br>(0.000)                       | 6.438<br>(0.243)                            |
| Controls                           | Yes                                        | Yes                                         | Yes                                         |
| Fixed Effects                      | Yes                                        | Yes                                         | Yes                                         |
| State Dummies                      | Yes                                        | Yes                                         | Yes                                         |
| Seasonality                        | Yes                                        | Yes                                         | Yes                                         |
| Estimation Sample                  | 693                                        | 647                                         | 391                                         |
| Adjusted R <sup>2</sup>            | 0.626                                      | 0.653                                       | 0.703                                       |

*p*-value in parentheses: 0 < \*\*\* < 0.001 < \*\* < 0.01 < \* < 0.05 < • < 0.1

**Table EC.32** Installer-level analysis for individual markets

| Variables                          | Installer's Activity Level |
|------------------------------------|----------------------------|
| Rating_Entropy_Self                | 2.480***<br>(0.000)        |
| Rating_Entropy_Self <sup>2</sup>   | -4.430***<br>(0.000)       |
| Rating_Entropy_Others              | 0.558**<br>(0.005)         |
| Rating_Entropy_Others <sup>2</sup> | -2.976***<br>(0.000)       |
| Controls                           | Yes                        |
| Fixed Effects                      | Yes                        |
| Market Dummies                     | Yes                        |
| Seasonality                        | Yes                        |
| Observations                       | 4187                       |
| Adjusted R <sup>2</sup>            | 0.614                      |

p-value in parentheses: 0 < \*\*\* < 0.001 < \*\* < 0.01 < \* < 0.05 < • < 0.1

**Table EC.33 Installer-level analysis with market dummies (instead of state dummies)**

| Variables                          | Installer Transaction |
|------------------------------------|-----------------------|
| Average_Rating_Self                | -0.019<br>(0.597)     |
| Average_Rating_Others              | -0.028<br>(0.602)     |
| Rating_Entropy_Self                | 0.362*<br>(0.011)     |
| Rating_Entropy_Self <sup>2</sup>   | -0.597*<br>(0.033)    |
| Rating_Entropy_Others              | 0.062<br>(0.489)      |
| Rating_Entropy_Others <sup>2</sup> | -0.678***<br>(0.000)  |
| Experience                         | 0.169**<br>(0.351)    |
| Price_Difference                   | 0.039<br>(0.291)      |
| Average_LogRevenue                 | 0.003<br>(0.567)      |
| Constant                           | 0.157<br>(0.778)      |
| Fixed Effects                      | Yes                   |
| State Dummies                      | Yes                   |
| Seasonality                        | Yes                   |
| Observations                       | 3426                  |
| Adjusted R <sup>2</sup>            | 0.490                 |

p-value in parentheses: 0 < \*\*\* < 0.001 < \*\* < 0.01 < \* < 0.05 < • < 0.1

**Table EC.34 Installer-level analysis (Matching vs. Entropy)**

| Variables             | N     | Mean   | Std. Dev. | Min    | Max    |
|-----------------------|-------|--------|-----------|--------|--------|
| Rating_Entropy_Self   | 4,384 | 0.101  | 0.221     | 0.000  | 1.210  |
| Rating_Entropy_Others | 4,384 | 0.230  | 0.182     | 0.000  | 1.071  |
| Average_Rating_Self   | 4,384 | 4.536  | 1.304     | 0.000  | 5.000  |
| Average_Rating_Others | 4,384 | 4.878  | 0.202     | 1.000  | 5.000  |
| Experience            | 4,384 | 1.812  | 0.890     | 0.000  | 3.714  |
| Price_Difference      | 4,384 | -0.032 | 0.397     | -2.171 | 3.212  |
| Average_LogRevenue    | 4,384 | 10.805 | 0.400     | 9.570  | 16.258 |
| Installer_Activity    | 4,384 | 2.417  | 1.692     | 0.000  | 7.257  |

**Table EC.35 Summary statistics - installer-level (non-demeaned entropy)**

| Variables            | N   | Mean   | Std. Dev. | Min    | Max    |
|----------------------|-----|--------|-----------|--------|--------|
| Rating_Entropy_Mkt   | 748 | 0.199  | 0.236     | 0.000  | 1.055  |
| Market_LogRevenue    | 748 | 15.795 | 2.221     | 10.380 | 22.303 |
| Average_Rating_Mkt   | 748 | 4.869  | 0.242     | 3.000  | 5.000  |
| Average_Experience   | 748 | 1.474  | 1.085     | 0.000  | 3.332  |
| Price_Difference_Mkt | 748 | -0.014 | 0.126     | -0.504 | 1.312  |
| Market_Transaction   | 748 | 0.965  | 1.030     | 0.000  | 4.522  |

**Table EC.36 Summary statistics - market-level (non-demeaned entropy)**

**References**

Davidson M (2019) What Neighborhood Is This? Estimating Material Based Neighborhood Boundaries Using Single-Family Homes. <https://ssrn.com/abstract=3485994> Working paper, University of Michigan at Ann Arbor.

Kanagala HK, Krishnaiah VJR (2016) A comparative study of K-Means, DBSCAN and OPTICS. 2016 International Conference on Computer Communication and Informatics (ICCCI), 1–6 (IEEE).

Loughran, T, McDonald, B (2011) When Is a Liability Not a Liability? Textual Analysis, Dictionaries, and 10-Ks. *The Journal of Finance*. 66(1): 35-65.

Teimouri M, Indahl UG, Tveite H (2016) A method to detect inactive periods in animal movement using density-based clustering. *Appl. Geogr.* 73:102–112.

US Census Bureau (2019) Gazetteer files. <https://www.census.gov/geographies/reference-files/time-series/geo/gazetteer-files.2018.html>. Accessed June 12, 2023.
